# Supplementary material
Source: publisher figshare collection journal article supplement (https://acs.figshare.com/ndownloader/files/4073392)

## **Supplementary information**

### **The unique proline-rich domain regulates the chaperone function of AIPL1**

Jing Li<sup>1</sup>, Gabriel Zoldak<sup>2,3</sup>, Thomas Kriehuber<sup>1</sup>, Joanna Soroka<sup>1</sup>, Franz Schmid<sup>2</sup>, Klaus Richter<sup>1</sup>  
and Johannes Buchner<sup>1</sup>

<sup>1</sup>Center for Integrated Protein Science at the Department Chemie, Technische Universität München, Germany

<sup>2</sup>Laboratorium für Biochemie, Universität Bayreuth, D-95440 Bayreuth, Germany

<sup>3</sup> Present address: Physik Department E22, Technische Universität München, Germany

To whom correspondence should be addressed: Center for Integrated Protein Science at the Department Chemie, Technische Universität München, Lichtenbergstrasse 4, 85747 Garching, Germany. Tel: 49-89-289-13341; Fax: 49-89-289-13345; Email: [johannes.buchner@tum.de](mailto:johannes.buchner@tum.de)

### Supplementary Fig. 1: Thermal stability of AIP, AIPL1 and their variants

To assess the stability of the different proteins, temperature-induced unfolding experiments were performed (a-d). Temperature-induced unfolding was monitored by far UV-CD spectroscopy at a fixed wavelength with a heating rate of 20 °C/h. Data were fitted to a Boltzmann function to obtain transition midpoints.

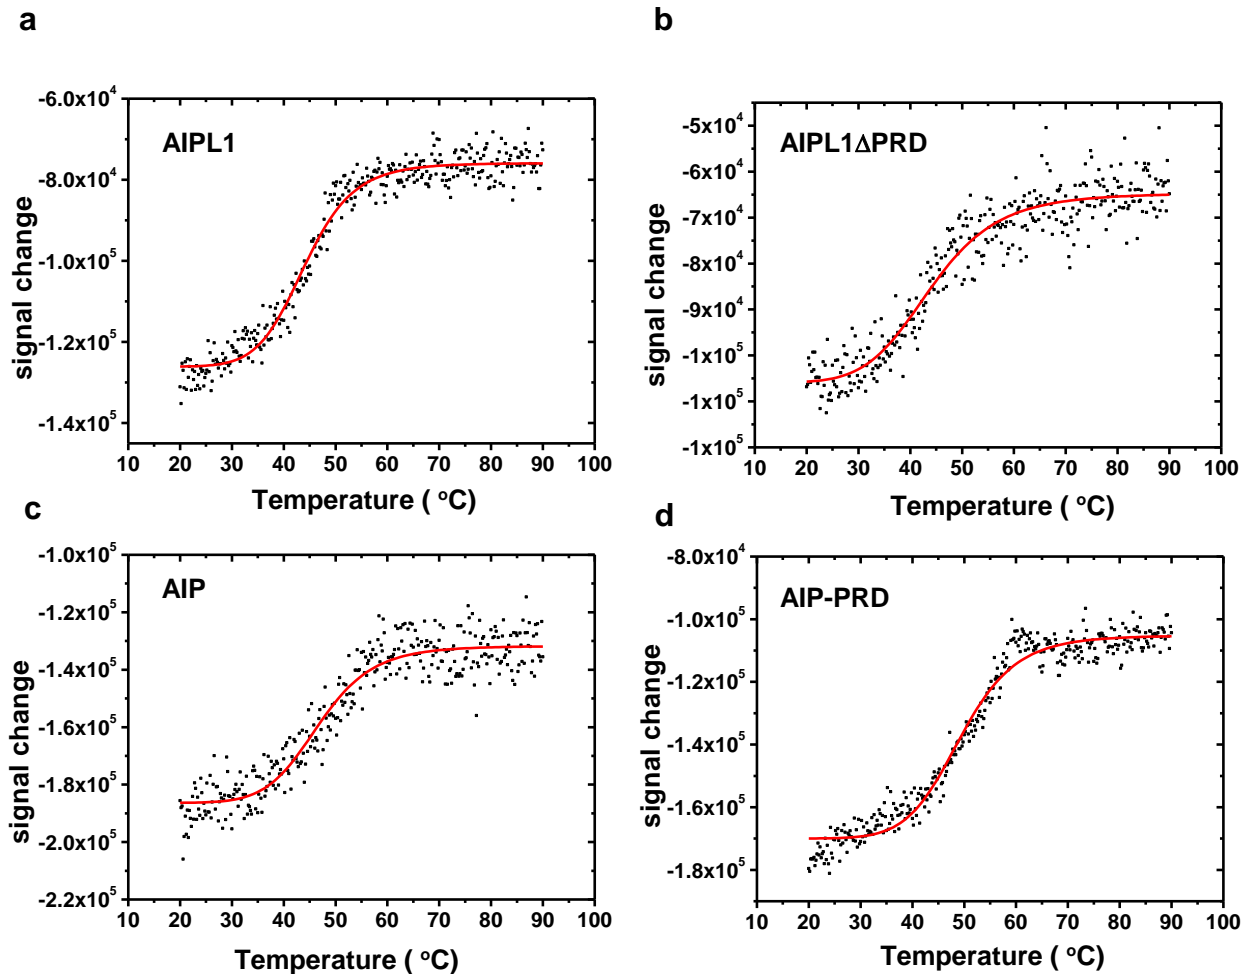

**Supplementary Fig. 2: The proline-rich domain is a negative regulator of Hsp90 interaction.**

- a. Determination of the affinity of AIP to Hsp90 by SPR. The  $K_D$  of AIP to hHsp90 was calculated to be 2.28  $\mu\text{M}$  based on injections with different concentration of AIP onto a human Hsp90-coated CM5 chip
- b. Determination of the affinity of AIP-PRD to Hsp90 by SPR. The  $K_D$  of AIP-PRD to hHsp90 was calculated to be 6.88  $\mu\text{M}$  based on injections with different concentrations of AIP-PRD onto a human Hsp90-coated CM5 chip.
- c. Determination of the affinity of AIPL1 to Hsp90 by SPR. The  $K_D$  of AIPL1 to hHsp90 was calculated to be 2.60  $\mu\text{M}$  based on injections with different concentration of AIPL1 onto a human Hsp90-coated CM5 chip
- d. Determination of the affinity of AIPL1 $\Delta$ PRD to Hsp90 by SPR. The  $K_D$  of AIPL1 $\Delta$ PRD to hHsp90 was calculated to be 0.89  $\mu\text{M}$  based on injections with different concentrations of AIPL1 $\Delta$ PRD onto a human Hsp90-coated CM5 chip.

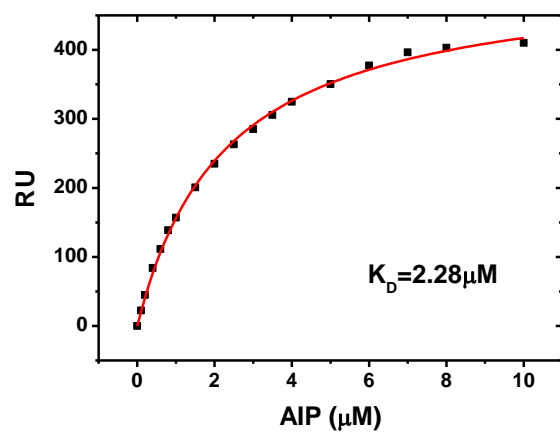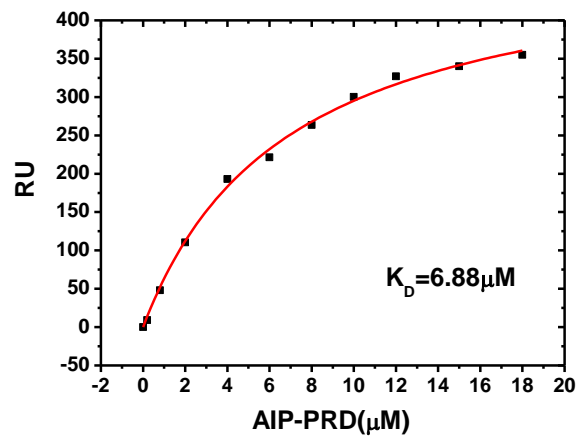

**c**

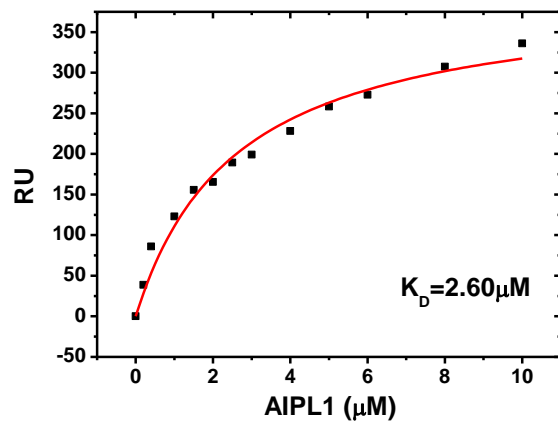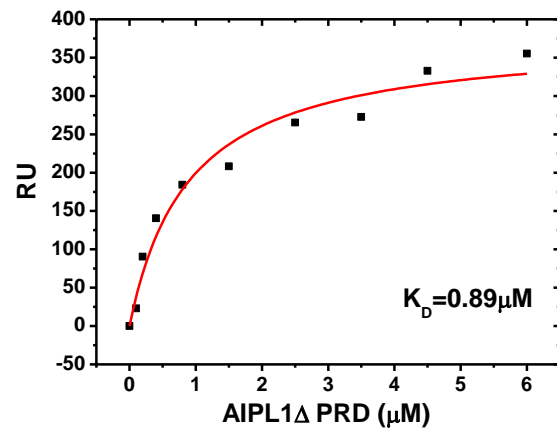

Supplement: Supplementary file 1 [file 4073392]
